# Supplementary material
Source: bioRxiv or medRxiv preprint supplement (https://www.biorxiv.org/highwire/filestream/108602/field_highwire_adjunct_files/25/178806-32.pdf)
Supplement: Supplementary file [file 178806-32.pdf]

**Supplementary Table 7:** This table shows the 23 groups of IDPs that were for the multi-phenotype tests.

| <b>IDP group</b>        | <b>Number of IDPs per group</b> |
|-------------------------|---------------------------------|
| T1_brain_vol_all        | 10                              |
| T1_Subcortical_all      | 15                              |
| T1_Subcortical_L_plus_R | 7                               |
| T1_FAST_ROIs            | 139                             |
| Freesurfer_volume       | 59                              |
| Freesurfer_area         | 212                             |
| Freesurfer_thickness    | 212                             |
| T2_star                 | 14                              |
| T2_star_L_plus_R        | 7                               |
| dMRI_Probtrackx         | 243                             |
| dMRI_FA                 | 75                              |
| dMRI_MD                 | 75                              |
| dMRI_MO                 | 75                              |
| dMRI_L1                 | 75                              |
| dMRI_L2                 | 75                              |
| dMRI_L3                 | 75                              |
| dMRI_ICVF               | 75                              |
| dMRI_OD                 | 75                              |
| dMRI_ISOVF              | 75                              |
| rfMRI_ICA_Features      | 6                               |
| tfMRI                   | 16                              |
| rfMRI_25                | 21                              |
| rfMRI_100               | 55                              |
